# Supplementary material for: Apoptotic stress causes mtDNA release during senescence and drives the SASP
Source: PubMed Central journal article supplement (PMC10584674; doi:10.1038/s41586-023-06621-4), 2023-10-11
Supplement: 41586_2023_6621_MOESM1_ESM.pdf [file 41586_2023_6621_MOESM1_ESM.pdf]

---

**Supplementary information**

---

**Apoptotic stress causes mtDNA release during senescence and drives the SASP**

---

In the format provided by the authors and unedited

# Supplementary Figure 1 uncropped western blots

Figures 1d & 2g

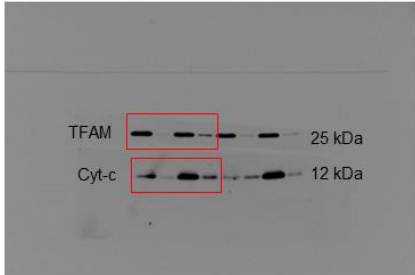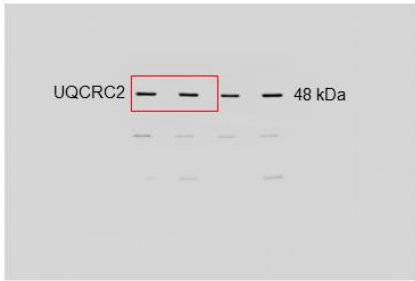

Figure 1e

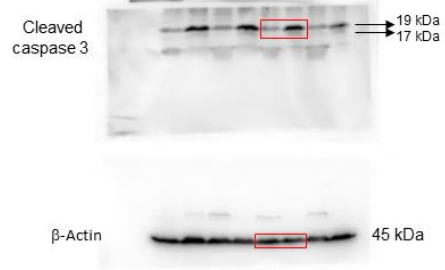

Figures 1f

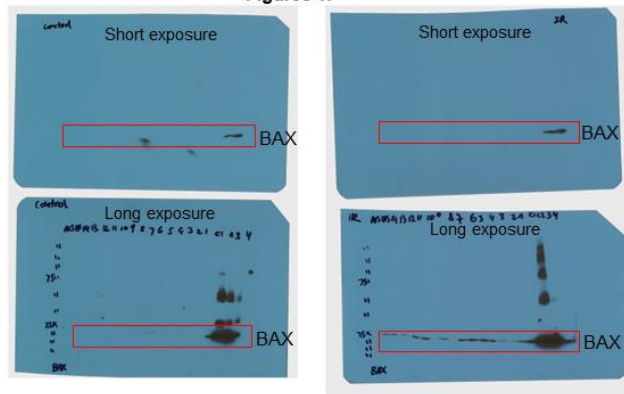

Figure 3a

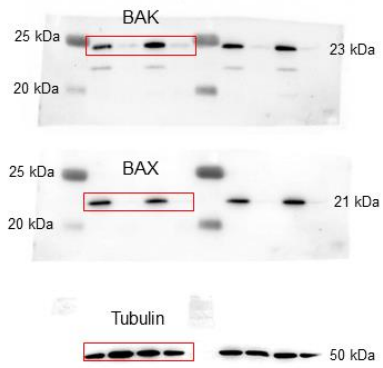

Figure 3j

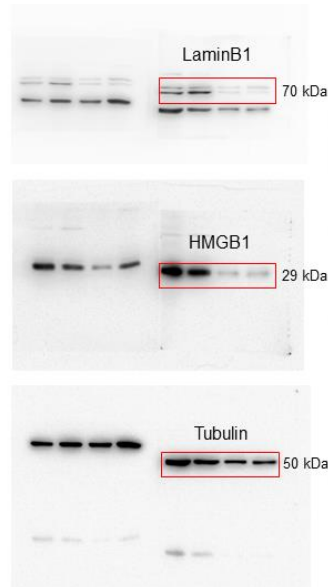

Figure 5b

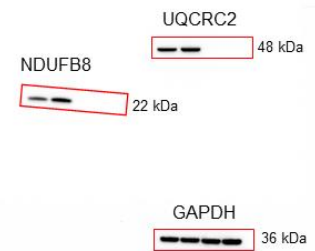

**Extended Data Figure 1a**

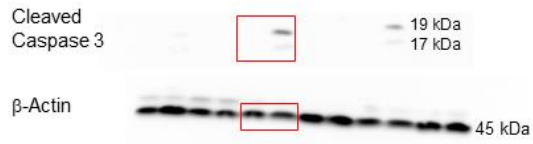

**Extended Data Figure 7c**

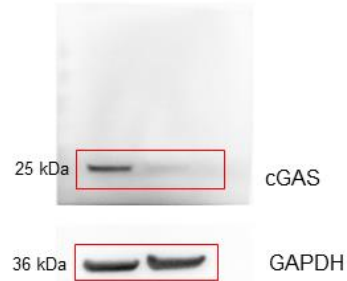

**Extended Data Figure 4b**

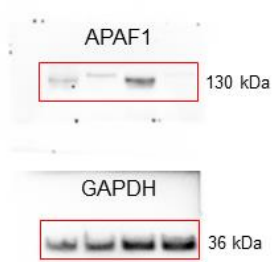

**Extended Data Figure 8c**

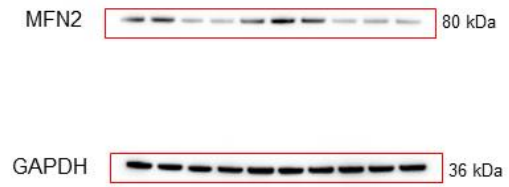

**Extended Data Figure 9b**

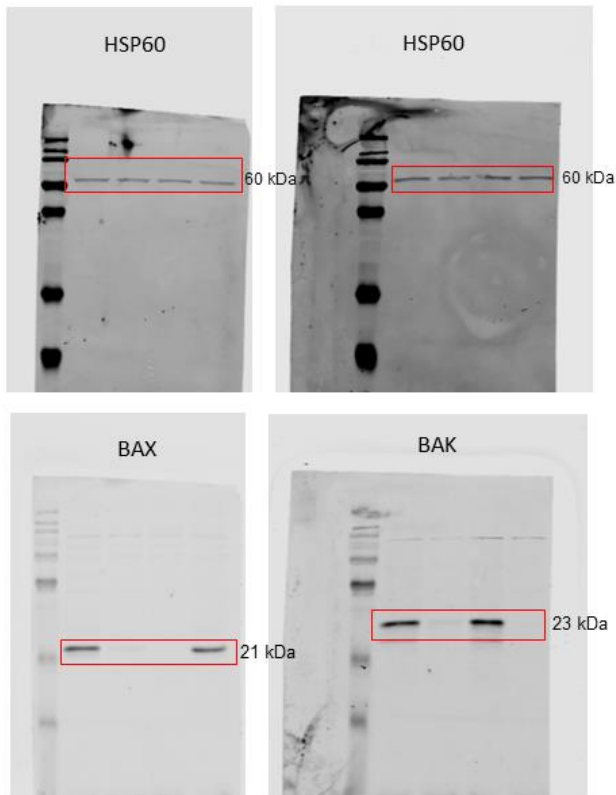

**Extended Data Figure 10f**

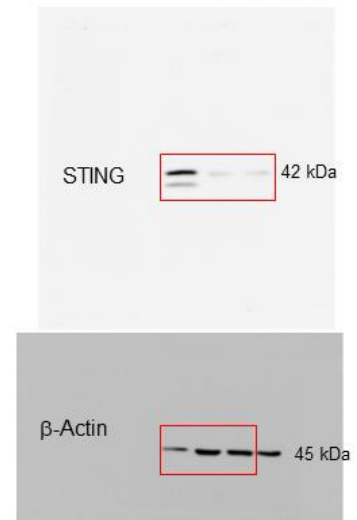

**Supplementary Figure 2**

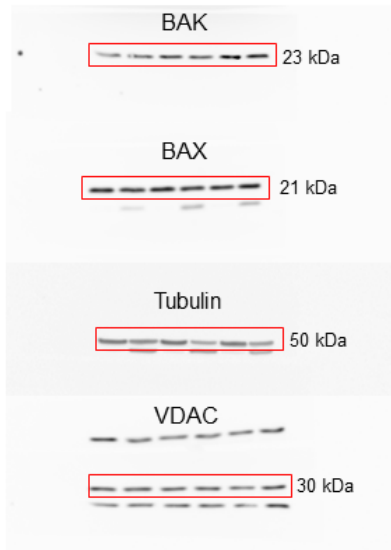

**Supplementary Figure 7c**

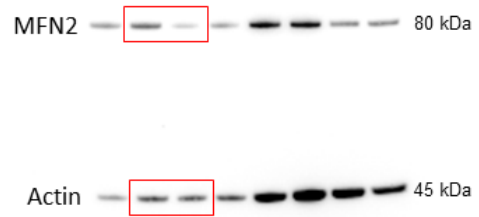

**Supplementary Figure 1- Source data for western blot analysis.** Uncropped Western blot raw data. The molecular weight marker is indicated on the left (given in kDa). Boxes with red lines indicate cropped regions as presented in the main, extended data and supplementary figures.

## Supplementary Figure 2

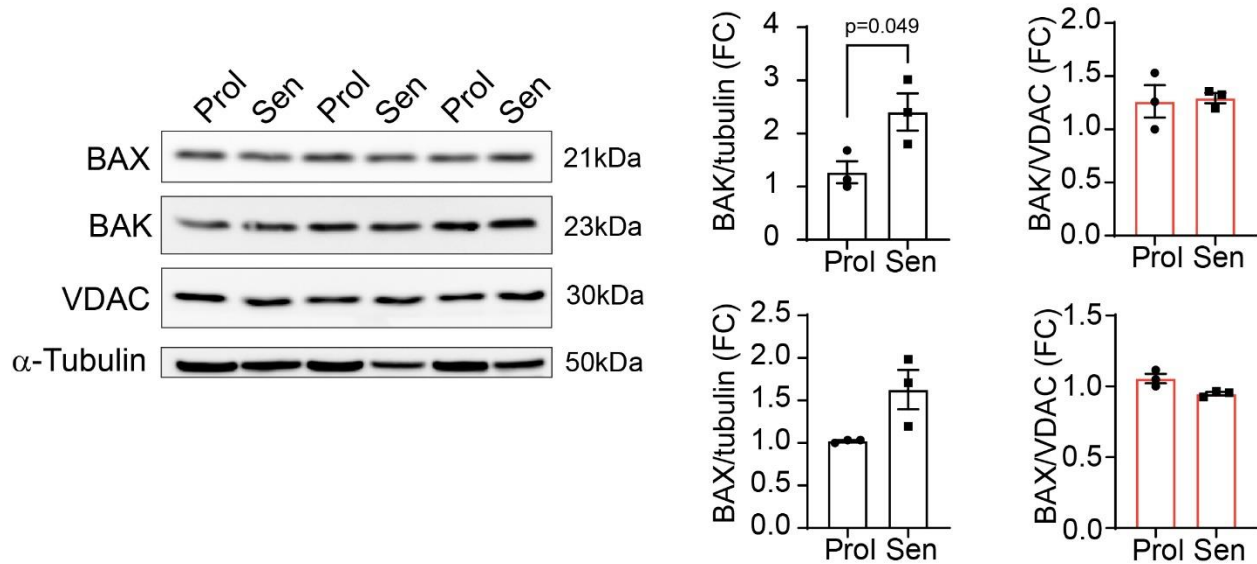

### Supplementary Figure 2 – Expression of BAX and BAK in proliferating and senescent MRC5 fibroblasts.

(Left) Western blotting showing expression of BAX, BAK, VDAC and  $\alpha$ -tubulin in proliferating and senescent (IR) MRC5 fibroblasts. (Right) Quantification of expression of BAX and BAK normalized either to  $\alpha$ -tubulin or VDAC. Data are mean of  $n=3$  independent experiments  $\pm$  S.E.M. Statistical significance (two-sided Student's unpaired t-test) is indicated. For gel source data, see Supplementary Figure 1.

### Supplementary Figure 3

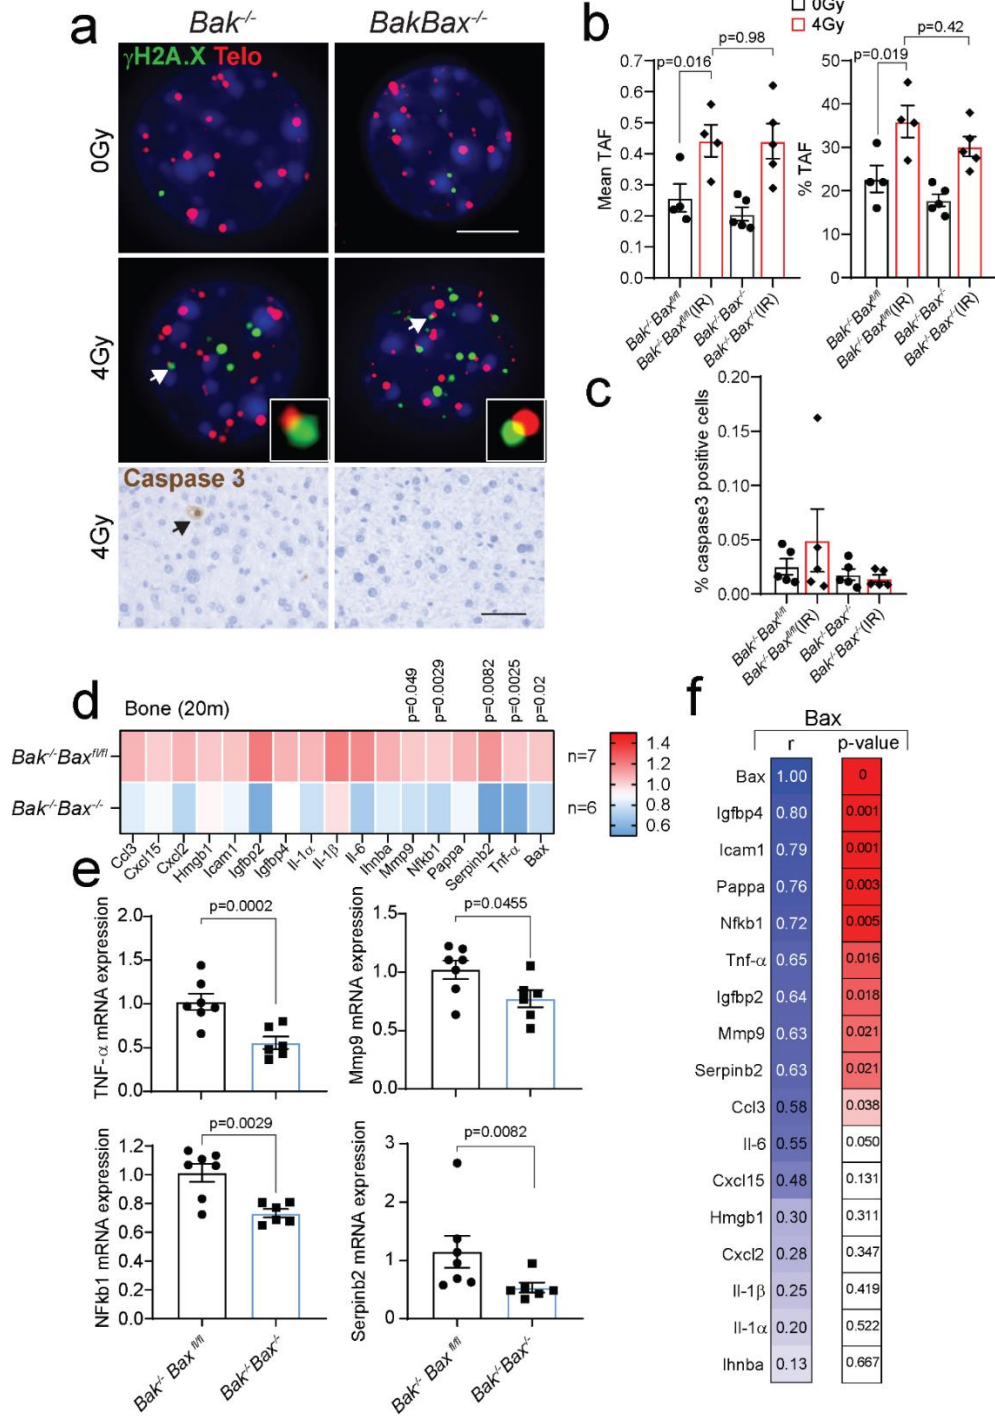

### Supplementary Figure 3 – Effect of AAV-Cre-mediated deletion of BAX and BAK in aged liver and bone.

(a) (Top) Representative immuno-FISH image in liver sections from Sham and 4Gy-irradiated *Baxfl/fl Bak<sup>-/-</sup>* and *BakBax<sup>-/-</sup>* mice.  $\gamma$ H2A.X is shown in green, telomeres are in red, and colocalization between the two is indicated by arrows and amplified at the bottom (scale bar is

5 $\mu$ m). (Bottom) Representative immunohistochemical image of caspase-3 in liver sections from irradiated *Bax<sup>fl/fl</sup> Bak<sup>-/-</sup>* and *BakBax<sup>-/-</sup>* mice (scale bar is 80 $\mu$ m). Quantification of **(b)** mean number of Telomere-associated foci (TAF) (left) and percentage of hepatocytes containing TAF (right) (n=4 Sham-IR and 4Gy-IR *Bak<sup>-/-</sup> Bax<sup>fl/fl</sup>*; n=5 Sham-IR and 4Gy-IR *Bak<sup>-/-</sup> Bax<sup>-/-</sup>* and **(c)** percentage of cells positive for caspase-3 in livers from *Bax<sup>fl/fl</sup> Bak<sup>-/-</sup>* and *BakBax<sup>-/-</sup>* mice (n=5) in the conditions indicated. **(d)** Heatmap showing mRNA levels of SASP factors and of Bax in the femur from aged *Bax<sup>fl/fl</sup> Bak<sup>-/-</sup>* following tail vein injection of AAV-Cre virus. **(e)** Graphs showing quantification of genes significantly reduced in **(d)**. **(f)** Heatmap showing correlation coefficients between expression levels of Bax and different SASP factors in the bone of aged *Bax<sup>fl/fl</sup> Bak<sup>-/-</sup>* (n=7) and *BaxBak<sup>-/-</sup>* (n=6) mice. Data are mean  $\pm$  S.E.M. Statistical significance was assessed using one-way ANOVA followed by Tukey's multiple comparison test (b, c), two-sided Student's unpaired t-test and Mann Whitney test (d and e).

## Supplementary Figure 4

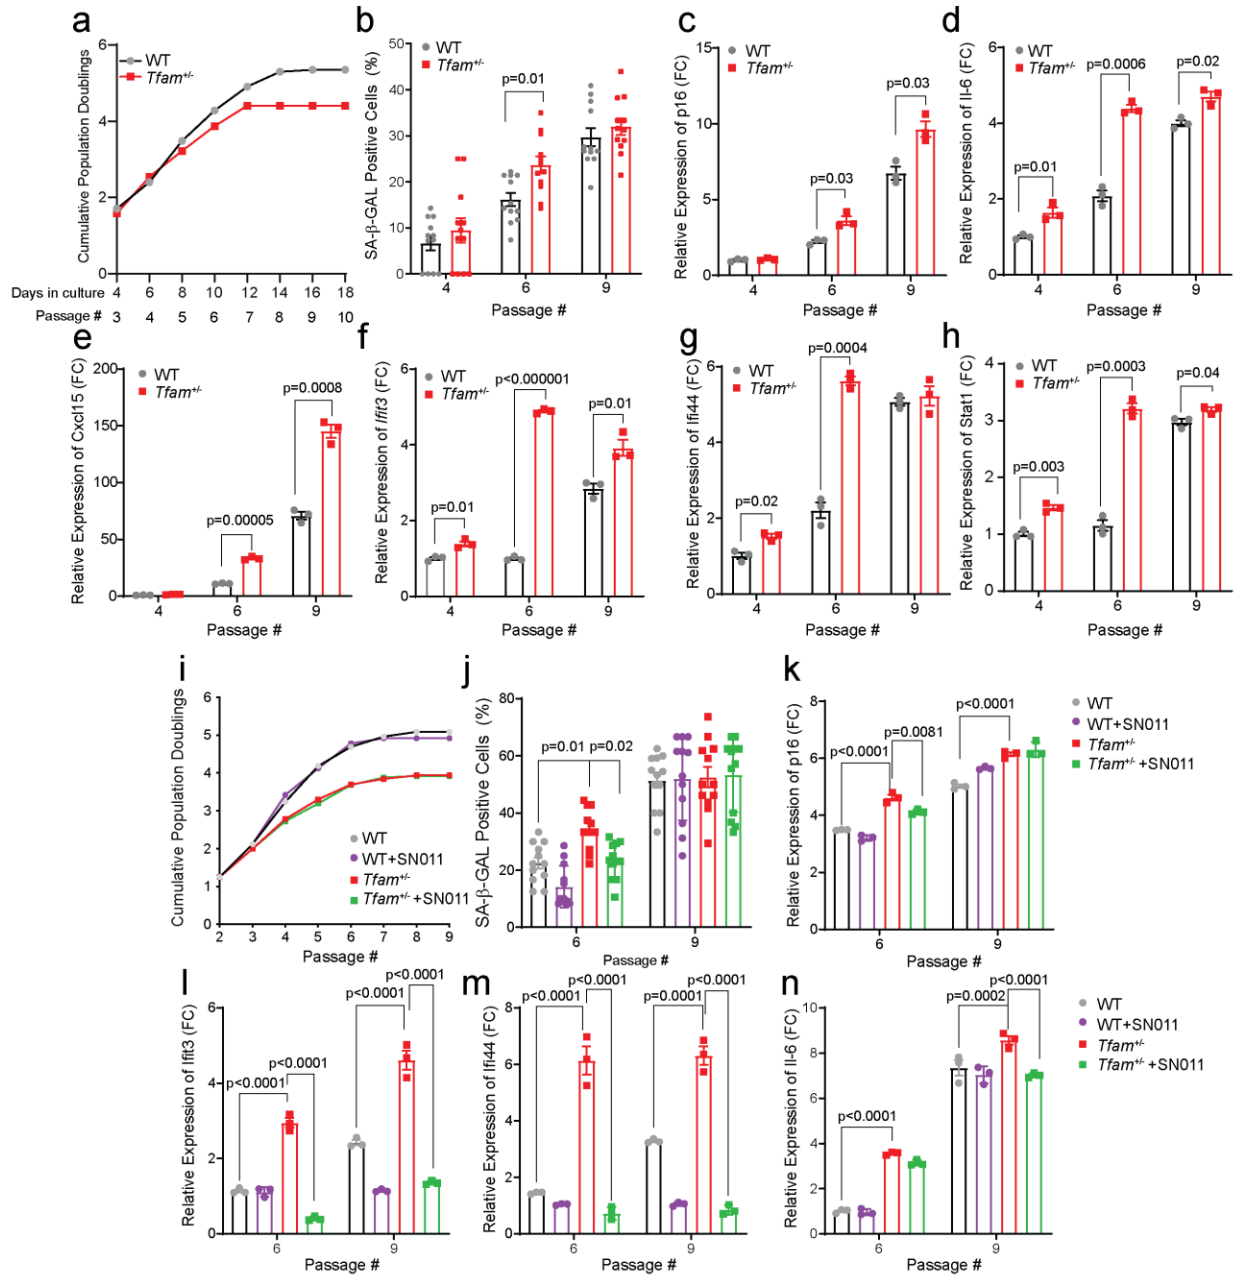

### Supplementary figure 4 – *Tfam*<sup>+/-</sup> MEFs show early onset of replicative senescence and increased SASP.

(a) Cumulative population doublings of Mouse embryonic fibroblasts (MEFs) derived from wildtype (WT) and *Tfam*<sup>+/-</sup> mice during 10 serial passages. Senescence was confirmed by (b) quantification of SA-β-GAL positive cells and (c) RT-qPCR assessment of p16<sup>Ink4a</sup> expression, as well as (d,e) RTqPCR assessment of SASP genes (Il-6 and Cxcl15) relative to Actin levels. (f-h) RT-qPCR assessment of ISGs (Ifit3, Ifi44, and Stat1) relative to Actin levels. (i) Cumulative



population doublings of MEFs derived from WT and *Tfam*<sup>+/-</sup> mice treated with vehicle (UNT) or 0.5uM of STING inhibitor SN011 during 9 serial passages. Senescence was confirmed by **(j)** quantification of SA-β-GAL positive cells (12 images *per* condition from 2 biological replicates; error bars indicate mean ± S.E.M) and **(k)** RT-qPCR assessment of p16Ink4a expression relative to Actin levels at passages 6 and 9. **(l-m)** RT-qPCR assessment of ISGs (Ifit3 and Irf4) and **(n)** Il-6 relative to Actin levels at passages 6 and 9. Data are mean ± S.E.M of n=3 independent experiments. Statistical significance was assessed by Two-sided unpaired t-test followed by Holm-Sidak's multiple comparison test (b-h) and One-Way ANOVA followed by Tukey's multiple comparison test (j-n).

## Supplementary Figure 5

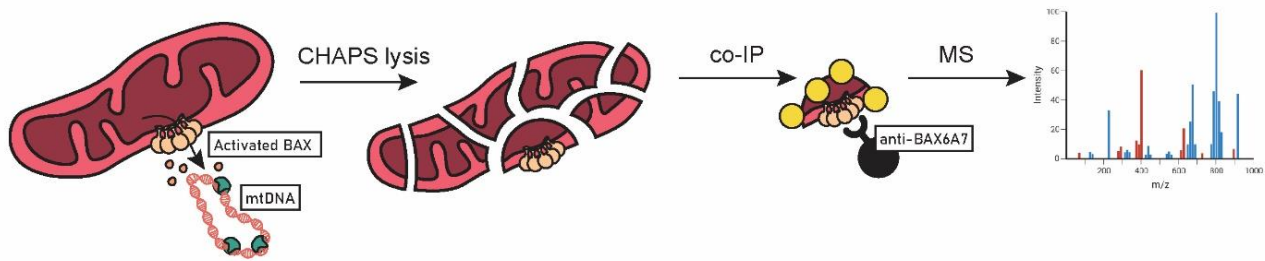

### MS proteomic analysis of activated-BAX interactome in senescent cells.

|                                            |                                                                                                                                                                                                                                                                                                                                                                                     |
|--------------------------------------------|-------------------------------------------------------------------------------------------------------------------------------------------------------------------------------------------------------------------------------------------------------------------------------------------------------------------------------------------------------------------------------------|
| biological process (GO term-based)         | interactors of activated BAX                                                                                                                                                                                                                                                                                                                                                        |
| mitochondrial function                     | <p><b>mitochondrial dynamics and trafficking:</b><br/>MFN2, ARMCX1, ARMCX2, VAT1</p> <p><b>mitochondrial energy metabolism:</b><br/>NDUFV2, NDUFB2, NDUFB11, NDUFC2, EFTB, SMIM20, DLAT</p> <p><b>mitochondrial lipid homeostasis:</b><br/>NME4, ACOT2</p> <p><b>other functions:</b><br/>DNAJA3, FAM210B, MRPS34, ATAD1,</p>                                                       |
| immunity                                   | CDC42SE1, PLGRKT, DEFA3, S100A7, LTA4H, LRCH4, IGKC, HLA-C, LYZ, IGLL5                                                                                                                                                                                                                                                                                                              |
| cytoskeleton organization                  | SYNE2, GSN, CDC42EP3, ACTN4, SNTB2, FSCN1, AFAP1, CAP1, TUBGCP2, TUBB6                                                                                                                                                                                                                                                                                                              |
| protein folding, degradation and transport | FBXL20, SMURF1, MAN1B1, CAPN1, DNAJA2, STIP1, FKBP15, FKBP7, DNAJB2, DNAJB11, SUMF1, AP1S1, CEP41, SEC31A, KDELR3, TNPO1                                                                                                                                                                                                                                                            |
| other processes                            | <p><b>nucleic acids metabolism:</b><br/>RBM33, UPF1, MBNL2, NCOR1, YBX3, ZNF445, SAP130</p> <p><b>cell fate and apoptosis:</b><br/>DNAJB4, STEAP3, DNAJA3</p> <p><b>cytoplasmic vesicles:</b><br/>EXOC4, VTI1A, VPS11</p> <p><b>other:</b><br/>SLC39A10, ANTXR1, CDSN, DSG1, DSC1, PPFIBP1, FBN2, ATP6V1D, EIF3G, EIF4A2, ZC3H15, CALML5, ANKS1B, TMEM256, KPRP, TMEM57, PRR14L</p> |

### Supplementary Figure 5 – Activated-BAX interactome includes mitochondrial dynamics factors.

(a) Schematic representation of the experimental design aimed at identification of activated-BAX interactors. Anti-BAX6A7 co-immunoprecipitates from crude mitochondria lysed in 1% CHAPS were subjected to MS analysis along whole cells as control fraction and isolated crude mitochondria as input fraction. (b) List of activated-BAX interactors selected following rigid selection criteria: (i) interactors should be detected only in immunoprecipitates from senescent cells and absent in immunoprecipitates from proliferative cells (ii) interactors should not be increased in the mitochondrial fraction of senescent cells (protein abundance in the input fraction)

of senescent cells should be equal to or lower than in proliferative cells) (iii) both unique peptides and calculated protein intensities should equal zero in immunoprecipitates from proliferative cells. As a proof of concept, activated BAX has been only immunoprecipitated from the mitochondria of senescent cells. Identified interactors belonged to several functional groups including mitochondrial dynamics and trafficking, mitochondrial energy metabolism, mitochondrial lipid homeostasis, immunity, and others.

Supplementary Figure 6

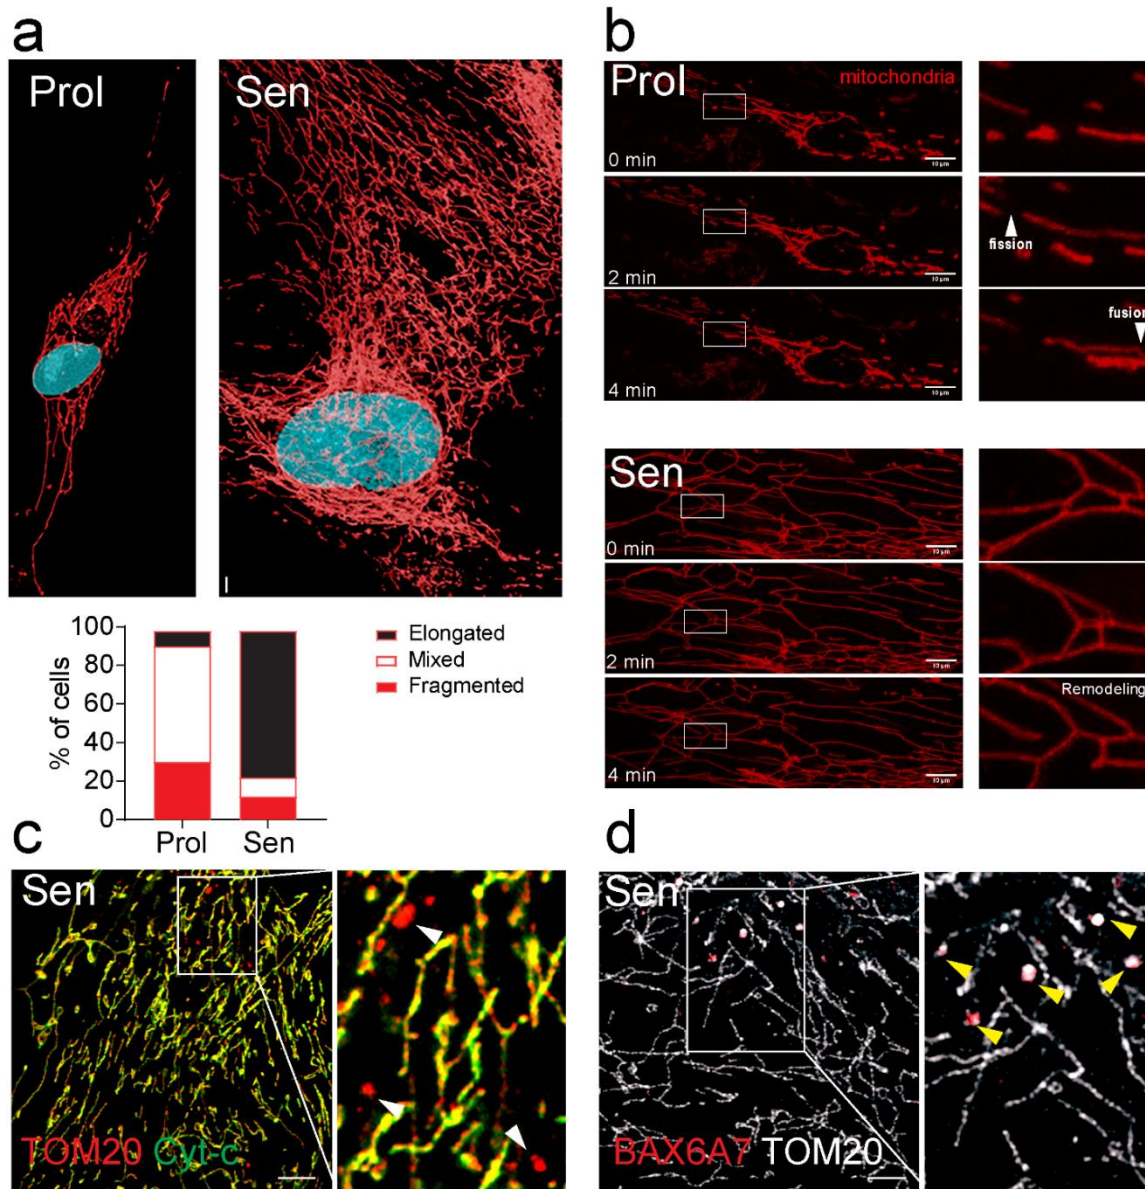

**Supplementary Figure 6 – Senescent cells exhibit a hyperfused mitochondrial network and only fragmented mitochondria show miMOMP.**

(a) (Top) Representative immunofluorescence image of proliferating and senescent (IR) IMR90 fibroblasts labelled with MitoTracker Red. (Bottom) Quantification of the percentage of proliferating and senescent cells containing elongated, mixed, and fragmented mitochondria network (data from 1 representative experiment) (scale bar is 10 $\mu$ m). (b) Representative live-cell image of proliferating and senescent IMR90 human fibroblasts labelled with CellLight<sup>TM</sup> Mitochondria-RFP at the time points indicated. Magnifications on the right show mitochondria network undergoing fission and fusion events. Representative immunofluorescence images of (c)

TOM20 (red) and cytochrome c (green), with magnification showing fragmented mitochondria lacking cytochrome c, and **(d)** BAX6A7 (red) and TOM20 (white) in senescent cells, with magnification showing fragmented mitochondria co-localizing with BAX6A7. Scale bars are 10 $\mu$ m. Images are representative of n=3 independent experiments.

## Supplementary Figure 7

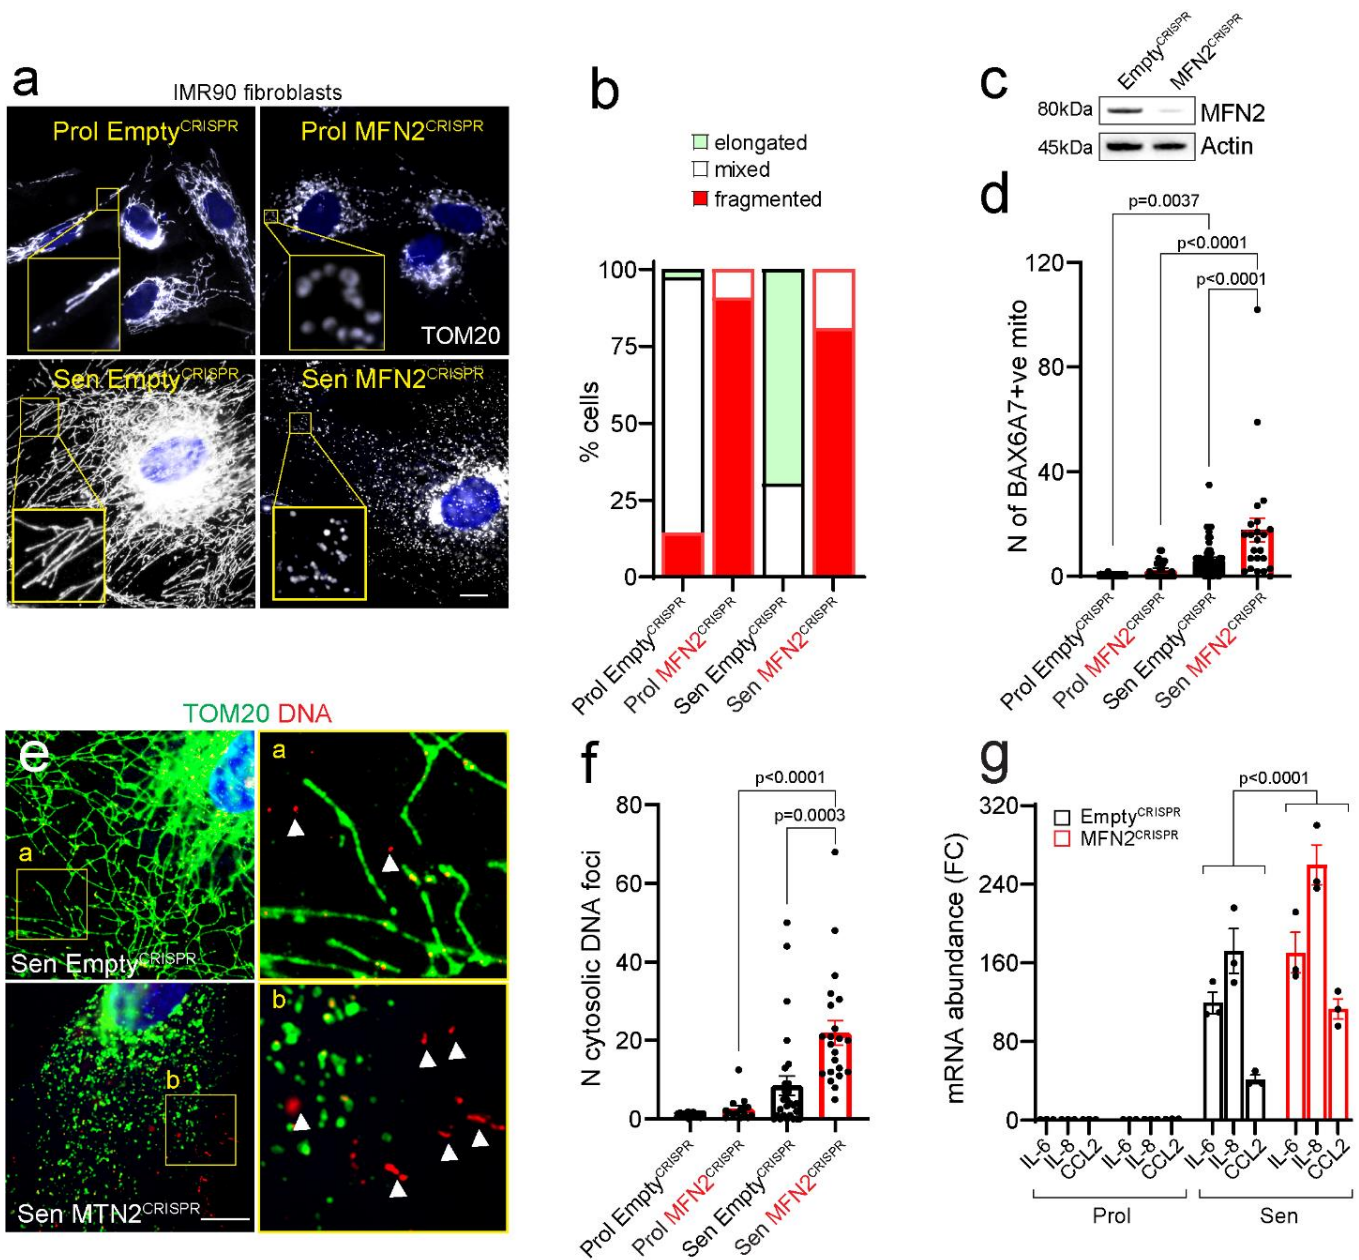

### Supplementary Figure 7 – MFN2 deficiency exacerbates mtDNA release and the SASP in senescent IMR90 fibroblasts.

(a) Representative immunofluorescence images of TOM20 (white) in proliferating and senescent (IR) control (EmptyCRISPR) and MFN2-deficient (MFN2CRISPR) IMR90 fibroblasts (scale bar in 20µm). Images are representative of n=2 independent experiments. (b) Quantification of the percentage of control and MFN2-deficient IMR90 fibroblasts containing elongated, mixed, and fragmented mitochondrial network (n=2 independent experiments). (c) Representative Western blot showing successful CRISPR-Cas9-mediated MFN2 deletion. Quantification of (d) the number of BAX6A7-positive mitochondria in proliferating and senescent controls and MFN2-deficient

IMR90 fibroblasts (n=56 and n=27 proliferating control and MFN2<sup>-/-</sup> cells, respectively; n=49 and n=23 senescent control and MFN2<sup>-/-</sup> cells, respectively, analyzed over 2 independent experiments). **(e)** Representative immunofluorescence images of TOM20 (green) and DNA (red) in proliferating and senescent control and MFN2-deficient IMR90 fibroblasts (scale bar is 20µm). Magnification on the right shows DNA foci located outside of TOM20. Images are representative of n=2 Independent experiments. **(f)** Quantification of the number of DNA foci found in the cytosol of proliferating and senescent control and MFN2-deficient IMR90 fibroblasts. Each dot represents the average number of DNA foci per cell per image (n=139 and n=96 proliferating control and MFN2<sup>-/-</sup> cells, respectively; n=50 and n=38 senescent control and MFN2<sup>-/-</sup> cells, respectively, analyzed over 2 independent experiments). **(g)** Quantification of mRNA expression levels of SASP genes in control and MFN2-deficient IMR90 fibroblasts (n=3 independent experiments). Data are mean ± S.E.M. Statistical significance was assessed using one-way ANOVA followed by Tukey's multiple comparison test (d, f, g). For gel source data (c), see Supplementary Figure 1.

## Supplementary Figure 8

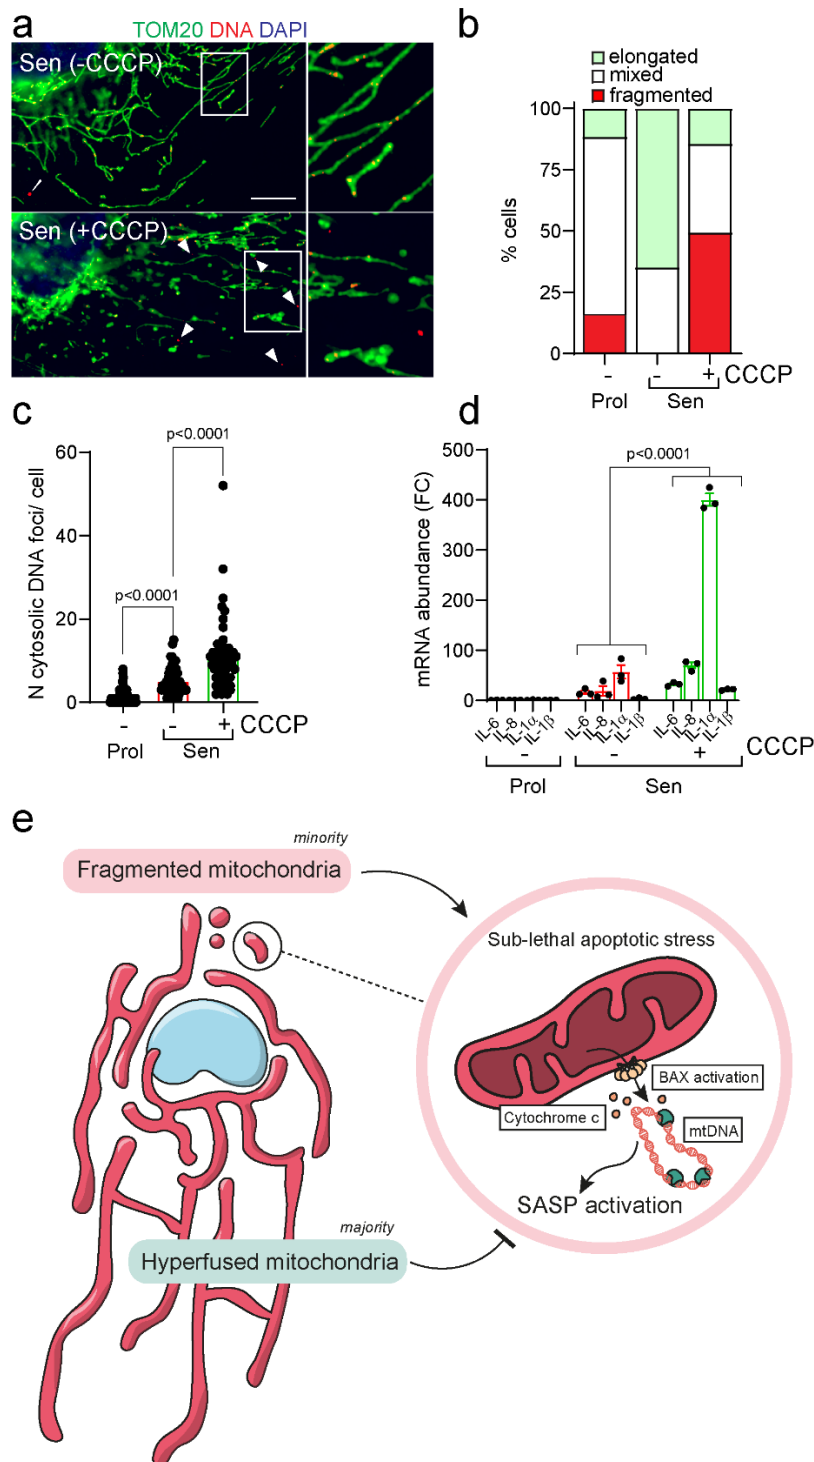

### Supplementary Figure 8 – CCCP-induced mitochondrial fragmentation exacerbates intracellular mtDNA release and the SASP during senescence.

**(a)** Representative immunofluorescence image of TOM20 (green) and DNA (red) in senescent cells with or without CCCP treatment (scale bar is 20 $\mu$ m). Magnification shows DNA foci outside of TOM20. Images are representative of n=3 independent experiments. **(b)** Quantification of the



percentage of cells containing elongated, mixed, and fragmented mitochondrial network following treatment with CCCP (n=111 Prol, n=65 Sen, n=43 Sen + CCCP cells analyzed over 3 independent experiments). **(c)** Quantification of the number of DNA foci found in the cytosol of proliferating and senescent (IR) cells at the conditions indicated (n=92 proliferating cells; n=63 senescent control cells; n=57 senescent cells treated with CCCP analyzed over 3 independent experiments). **(d)** Quantification of mRNA expression levels of the SASP genes indicated in proliferating and senescent cells following CCCP treatment. Data are mean of n=3 independent experiments. **(e)** Scheme depicting our hypothesis: In senescent cells majority of mitochondria can be found in a hyperfused state which limits MOMP and the SASP. Only a small subset of fragmented mitochondria undergoes MOMP (miMOMP) and this is sufficient to account for the increased cytosolic mtDNA, activation of cGAS-STING and the SASP. Data are mean  $\pm$  S.E.M. Statistical significance was assessed using one-way ANOVA followed by Tukey's multiple comparison test (c), two-way ANOVA followed by Tukey's multiple comparison test (d).

## Supplementary Figure 9

Individual and mean brain concentration of BAI1 (ng/g)

| Time (h) | M01+3n | M02+3n | M03+3n | Mean | SD     |
|----------|--------|--------|--------|------|--------|
| 0        | BQL*   | BQL    | BQL    | ND*  | ± ND   |
| 1        | 152    | 170    | 176    | 166  | ± 12.5 |
| 2        | 159    | 164    | 200    | 174  | ± 22.4 |
| 4        | 244    | 284    | 286    | 271  | ± 23.7 |
| 8        | 427    | 389    | 389    | 402  | ± 21.9 |
| 24       | 805    | 860    | 845    | 837  | ± 28.4 |

BQL: = Below the lower limit of quantitation

ND: Not determined

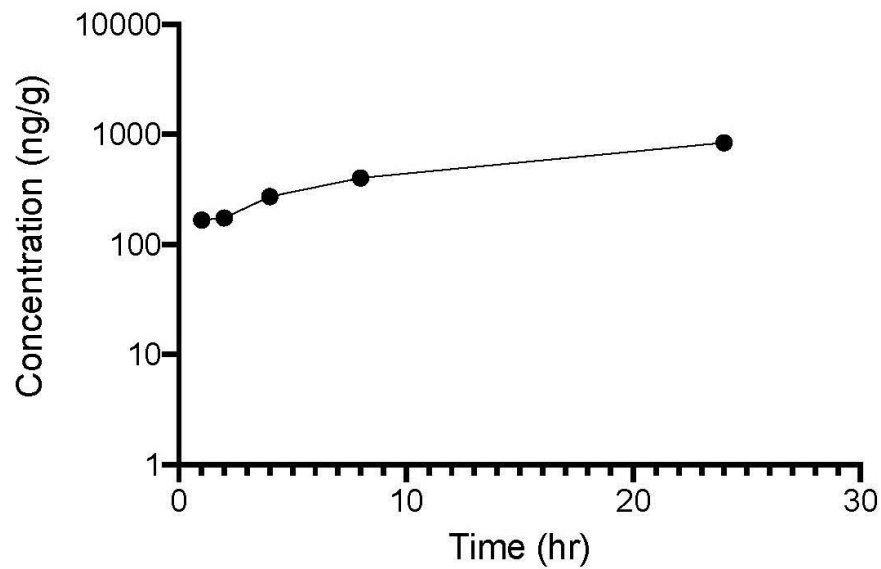

### Supplementary Figure 9 – BAI1 crosses the Blood Brain Barrier.

Above- table showing individual and mean concentration of BAI1 detected in brain tissue from aged (>16 months old) C57BL/6J male mice injected with BAI1 at different time points (n=3 mice per time point). Below- graph depicting kinetics of BAI1 in brain tissue up to 24 hours.

**Supplemental tables:**

**Table 1:** – Antibodies used for immunocytochemistry and immunohistochemistry

| <b>Primary antibodies</b>                                                                | <b>Source</b>            | <b>Product number</b> | <b>Concentration</b> |
|------------------------------------------------------------------------------------------|--------------------------|-----------------------|----------------------|
| Anti-TOMM20 rabbit polyclonal antibody                                                   | Millipore Sigma          | HPA011562             | 1:200                |
| Anti-Cytochrome c mouse monoclonal antibody                                              | BioLegend                | 612301                | 1:1000               |
| Anti-Bax(6A7) mouse monoclonal antibody                                                  | Santa Cruz               | sc-23959              | 1:100                |
| Anti-Phospho-Histone H2A.X (Ser139) (20E3) rabbit monoclonal antibody                    | Cell Signaling           | 9718                  | 1:1000               |
| Anti-DNA mouse monoclonal antibody                                                       | Millipore Sigma          | CBL186                | 1:100                |
| Anti-TFAM rabbit monoclonal antibody                                                     | Cell Signaling           | 8076S                 | 1:100                |
| Anti-p16 (E6H4) mouse monoclonal antibody                                                | Roche                    | 705-4713              | 1:5                  |
| Anti p21 Waf1 Cip1 (12D1) rabbit monoclonal antibody                                     | Cell Signaling           | 2947S                 | 1:1000               |
| Anti-Ki67 rabbit polyclonal antibody                                                     | Abcam                    | ab15580               | 1:1000               |
| Anti-Bax (D3R2M) rabbit monoclonal antibody                                              | Cell Signaling           | 14796                 | 1:100                |
| Anti-Cleaved Caspase-3 (Asp175) Antibody                                                 | Cell Signaling           | 9661                  | 1:50                 |
| <b>Secondary antibodies</b>                                                              |                          |                       |                      |
| <b>Secondary antibodies</b>                                                              | <b>Source</b>            | <b>Product number</b> | <b>Concentration</b> |
| Goat anti-Rabbit IgG (H+L), Superclonal™ Recombinant Secondary Antibody, Alexa Fluor 647 | Thermo Fisher Scientific | A-27040               | 1:1000               |
| Goat anti-Rabbit IgG (H+L) Cross-Adsorbed Secondary Antibody, Alexa Fluor 488            | Thermo Fisher Scientific | A-11008               | 1:1000               |
| Goat anti-Rabbit IgG (H+L) Cross-Adsorbed Secondary Antibody, Alexa Fluor 594            | Thermo Fisher Scientific | A-11012               | 1:1000               |
| Goat anti-Mouse IgG (H+L) Highly Cross-Adsorbed Secondary Antibody, Alexa Fluor 594      | Thermo Fisher Scientific | A-11032               | 1:1000               |
| Goat anti-Mouse IgG (H+L) Cross-Adsorbed Secondary Antibody, Alexa Fluor 647             | Thermo Fisher Scientific | A-21235               | 1:1000               |
| Goat anti-Mouse IgG (H+L), Superclonal™ Recombinant                                      | Thermo Fisher Scientific | A-28175               | 1:1000               |

|                                     |  |  |  |
|-------------------------------------|--|--|--|
| Secondary Antibody, Alexa Fluor 488 |  |  |  |
|-------------------------------------|--|--|--|

**Table 2:** – Antibodies used for Western blotting.

| <b>Primary antibodies</b>                                     | <b>Source</b>  | <b>Catalog number</b> | <b>Concentration</b> |
|---------------------------------------------------------------|----------------|-----------------------|----------------------|
| Anti-cytochrome c (D18C7) rabbit monoclonal antibody          | Cell Signaling | 11940S                | 1:1000               |
| Anti-UQCR2 rabbit monoclonal antibody                         | Abcam          | ab103616              | 1:1000               |
| Anti-Cleaved Caspase 3 (D175 hAIE) rabbit monoclonal antibody | Cell Signaling | 9664S                 | 1:500                |
| Anti- $\beta$ -actin mouse monoclonal antibody                | Abcam          | ab8226                | 1:10000              |
| Anti-TFAM rabbit monoclonal antibody                          | Cell Signaling | 8076S                 | 1:200                |
| Anti-Bak (D4E4) rabbit monoclonal antibody                    | Cell Signaling | 12105                 | 1:1000               |
| Anti-Bax (D2E11) rabbit monoclonal antibody                   | Cell Signaling | 5023                  | 1:1000               |
| Anti-Bax (6A7) mouse monoclonal antibody                      | Santa Cruz     | sc-23959              | 1:1000               |
| Anti- $\beta$ -Tubulin rabbit polyclonal antibody             | Cell Signaling | 2146S                 | 1:10000              |
| Anti-Lamin B1 rabbit polyclonal antibody                      | Abcam          | ab16048               | 1:1000               |
| Anti-HMGB1 rabbit monoclonal antibody                         | Cell Signaling | 6893S                 | 1:1000               |
| Anti-NDUFB8 mouse monoclonal antibody                         | Abcam          | ab110242              | 1:1000               |
| Anti-GAPDH rabbit monoclonal antibody                         | Cell Signaling | 5174S                 | 1:1000               |
| Anti-cGAS (D1D3G) rabbit monoclonal antibody                  | Cell Signaling | 15102                 | 1:1000               |
| Anti-STING (D2P2F) rabbit monoclonal antibody                 | Cell Signaling | 13647S                | 1:1000               |
| Anti-APAF1 rabbit monoclonal antibody                         | Cell Signaling | 8723S                 | 1:500                |
|                                                               |                |                       |                      |
| <b>Secondary antibodies</b>                                   | <b>Source</b>  | <b>Catalog number</b> | <b>Concentration</b> |
| Goat Anti-Rabbit HRP Conjugated                               | Sigma Aldrich  | A0545                 | 1:5000               |
| Goat Anti-Mouse HRP Conjugated                                | Sigma Aldrich  | A2554                 | 1:5000               |

**Table 3:** – qPCR Primer assays used.

| <b>Human qPCR Primer Assay</b>   | <b>Source</b> | <b>Product number</b> |
|----------------------------------|---------------|-----------------------|
| CDKN1a (p21)                     | IDT           | Hs.PT.58.38492863.g   |
| CDKN2a (p16) (Fig. 3e, Supp 3)   | IDT           | Hs.PT.58.40743463.g   |
| CDKN2b (Supp. 3)                 | IDT           | Hs.PT.58.4919581      |
| CX3CL1 (Supp. 2f)                | IDT           | Hs.PT.58.19601997     |
| IFN- $\alpha$                    | IDT           | Hs.PT.58.39481063.g   |
| IFN- $\beta$                     | IDT           | Hs.PT.58.46311748.g   |
| IL-1 $\beta$ (Supp. 2e, Supp. 3) | IDT           | Hs.PT.58.1518186      |
| IL-1 $\alpha$                    | IDT           | Hs.PT.58.40913627     |
| IL-6                             | IDT           | Hs.PT.58.40226675     |
| IL-8                             | IDT           | Hs.PT.58.39926886.g   |
| MCP1 (CCL2) (Supp. 3)            | IDT           | Hs.PT.58.45467977     |
| RSP16                            | IDT           | Hs.PT.58.366374       |
|                                  |               |                       |
| <b>Mice qPCR Primer Assay</b>    | <b>Source</b> | <b>Product number</b> |
| Bax                              | IDT           | Mm.PT.58.14012210     |
| Ccl2                             | IDT           | Mm.PT.58.42151692     |
| Cdkn1a (p21)                     | IDT           | Mm.PT.58.5884610      |
| Cdkn2a (p16)                     | IDT           | Mm.PT.58.42804808     |
| Col3a1                           | IDT           | Mm.PT.58.13848686     |
| Cx3cl1                           | IDT           | Mm.PT.58.8767901      |
| Cxcl1                            | IDT           | Mm.PT.58.42076891     |
| Cxcl12                           | IDT           | Mm.PT.58.12038563     |
| Cxcl14                           | IDT           | Mm.PT.58.21980826     |
| Ifi44                            | IDT           | Mm.PT.58.12162024     |
| Il1- $\alpha$                    | IDT           | Mm.PT.58.32778767     |
| Il1- $\beta$                     | IDT           | Mm.PT.58.41616450     |
| Il-6                             | IDT           | Mm.PT.58.13354106     |
| Il7                              | IDT           | Mm.PT.58.10325839     |
| Inhibin-a                        | IDT           | Mm.PT.58.11832629     |
| Mmp13                            | IDT           | Mm.PT.58.42286812     |
| Mmp2                             | IDT           | Mm.PT.58.9606100      |
| Mmp3                             | IDT           | Mm.PT.58.9719290      |
| Oas1b                            | IDT           | Mm.PT.56a.10289138.g  |
| Oasl2                            | IDT           | Mm.PT.58.17167264     |

**Table 4:** – Sybr Green primers used for qPCR.

| <b>Gene name</b> | <b>Forward and reverse PCR primer sequences</b>        |
|------------------|--------------------------------------------------------|
| hMT-Dloop        | CATCTGGTTCCTACTTCAGGG<br>CCGTGAGTGGTTAATAGGGTG         |
| mMT-Dloop        | AATCTACCATCCTCCGTGAAACC<br>TCAGTTTAGCTACCCCAAGTTTAA    |
| mActinb          | ATGCTCCCCGGGCTGTAT<br>CATAGGAGTCCTTCTGACCCATTC         |
| mCdkn2a          | GAACTCTTTCGGTCGTACCC<br>CGAATCTGCACCGTAGTTGA           |
| mCxcl15          | GTCCTTAACCTAGGCATCTTCG<br>TCTGTTGCAGTAAATGGTCTCG       |
| mIl6             | TGATGCACTTGCAGAAAACA<br>ACCAGAGGAAATTTTCAATAGGC        |
| mStat1           | CGCGCATGCAACTGGCATATAACT<br>ATGCTTCCGTTCCCACGTAGACTT   |
| mIrf3            | TTCCCAGCAGCACAGAAAC<br>AAATTCAGGTGAAATGGCA             |
| mIrf44           | CTGATTACAAAAGAAGACATGACAGAC<br>AGGCAAACCAAAGACTCCA     |
| mIL6             | CTACCAAACCTGGATATAATCAGGA<br>CCAGGTAGCTATGGTACTCCAGAA  |
| mIL1a            | AGGAGAGCCGGGTGACAGTA<br>TCAGAATCTTCCCGTTGCTTG          |
| mIL-1b           | CCAAAAGATGAAGGGCTGCT<br>TCATCAGGACAGCCCAGGTC           |
| mCXCL1           | CAATGAGCTGCGCTGTCAGT<br>TTGAGGTGAATCCCAGCCAT           |
| mMMP3            | TGGAGCTGATGCATAAGCCC<br>TGAAGCCACCAACATCAGGA           |
| mIFNA            | GGACTTTGGATTCCCGCAGGAGAAG<br>GCTGCATCAGACAGCCTTGCAGGTC |
| mOAS1            | GCCTGATCCCAGAATCTATGC<br>GAGCAACTCTAGGGCGTACTG         |
| mInhibinA        | GATCATCACCTTTGCCGAGT<br>TGGTCCTGGTTCTGTTAGCC           |
| m18s             | GTAACCCGTTGAACCCCAT<br>CCATCCAATCGGTAGTAGCG            |
| mCcl2            | GTCTGTGCTGACCCCAAGAAG<br>TGGTTCCGATCCAGGTTTTTA         |
| mCcl3            | TCCCAGCCAGGTGTCATTTT<br>TTGGAGTCAGCGCAGATCTG           |
| mCcl5            | GCCCACGTCAAGGAGTATTTCT<br>ACAAACACGACTGCAAGATTGG       |
| mCcl7            | CCCTGGGAAGCTGTTATCTTCA<br>CTGATGGGCTTCAGCACAGA         |
| mCsf1            | ATTGCCAAGGAGGTGTCAGAA<br>GGACCTTCAGGTGTCCATTCC         |

|           |                                                   |
|-----------|---------------------------------------------------|
| mCxcl1    | CCGAAGTCATAGCCCACTCAA<br>CAAGGGAGCTTCAGGGTCAAG    |
| mCxcl2    | TCAAGGGCGGTCAAAAAGTT<br>CAGTTAGCCTTGCCTTTGTTCA    |
| mCxcl15   | TCCATGGGTGAAGGCTACTGT<br>TTCATTGCCGGTGGAAATTC     |
| mHmgb1    | TCCTTCGGCCTTCTTCTTGTT<br>AGGATGCTCGCCTTTGATTTT    |
| mIcam1    | GTGGCGGGAAAGTTCCTGTT<br>GTCCAGCCGAGGACCATAACA     |
| mIgfbp2   | GCCCCCTGGAACATCTCTACT<br>GTTGTACCGGCCATGCTTGT     |
| mIgfbp4   | GCAACTTCCACCCCAAACAGT<br>CCTGTCTTCCGATCCACACA     |
| mI11a     | AAGAGACCATCCAACCCAGATC<br>CCTGACGAGCTTCATCAGTTTG  |
| mI11b     | TCAGGCAGGCAGTATCACTCA<br>CACGGGAAAGACACAGGTAGCT   |
| mI16      | ACCACGGCCTTCCCTACTTC<br>TTGGGAGTGGTATCCTCTGTGA    |
| mI17a     | GGA CTCTCCACCGCAATGAA<br>GCACTGAGCTTCCCAGATCAC    |
| mInhba    | CAGGAAGACACTGCAC TTTGA<br>TTCAGGAAGAGCCACACTTCT   |
| mMmp3     | TTGACGATGATGAACGATGGA<br>GAGCAGCAACCAGGAATAGGTT   |
| mMmp9     | TGAGTCCGGCAGACAATCCT<br>CCCTGGATCTCAGCAATAGCA     |
| mMmp12    | GTGCCCGATGTACAGCATCTT<br>GGTACCGCTTCATCCATCTTG    |
| mMmp13    | TGAGGAAGACCTTGTGTTTGCA<br>GCAAGAGTCGCAGGATGGTAGT  |
| mNfkb1    | GGCTTTGCAAACCTGGGAAT<br>TCCGTGCTTCCAGTGTTTCA      |
| mPappa    | CATCTCAGGTGTGTCGAACCA<br>TGCAAGGATACCAAGCATGCT    |
| mSerpine1 | GGACACCCTCAGCATGTTCA<br>CGGAGAGGTGCACATCTTTCT     |
| mSerpib2  | TTCCGCATACTGGAAACATCAG<br>GGATGCGTCCTCAATCTCATC   |
| mTnf      | GTTCTGCAAAGGGAGAGTGG<br>GCACCTCAGGGAAGAGTCTG      |
| mActb     | AATCGTGCGTGACATCAAAGAG<br>GCCATCTCCTGCTCGAAGTC    |
| mHprt     | CGTGATTAGCGATGATGAACCA<br>TCCAAATCCTCGGCATAATGA   |
| mTuba1    | GGTTCCCAAAGATGTCAATGCT<br>CAAACCTGGATGGTACGCTTGGT |
