# Supplementary material for: Apoptotic stress causes mtDNA release during senescence and drives the SASP
Source: PubMed Central journal article supplement (PMC10584674; doi:10.1038/s41586-023-06621-4), 2023-10-11
Supplement: 41586_2023_6621_MOESM2_ESM.pdf [file 41586_2023_6621_MOESM2_ESM.pdf]

## Reporting Summary

Nature Portfolio wishes to improve the reproducibility of the work that we publish. This form provides structure for consistency and transparency in reporting. For further information on Nature Portfolio policies, see our [Editorial Policies](#) and the [Editorial Policy Checklist](#).

### Statistics

For all statistical analyses, confirm that the following items are present in the figure legend, table legend, main text, or Methods section.

- | n/a                                 | Confirmed                                                                                                                                                                                                                                                                                      |
|-------------------------------------|------------------------------------------------------------------------------------------------------------------------------------------------------------------------------------------------------------------------------------------------------------------------------------------------|
| <input type="checkbox"/>            | <input checked="" type="checkbox"/> The exact sample size ( $n$ ) for each experimental group/condition, given as a discrete number and unit of measurement                                                                                                                                    |
| <input type="checkbox"/>            | <input checked="" type="checkbox"/> A statement on whether measurements were taken from distinct samples or whether the same sample was measured repeatedly                                                                                                                                    |
| <input type="checkbox"/>            | <input checked="" type="checkbox"/> The statistical test(s) used AND whether they are one- or two-sided<br><i>Only common tests should be described solely by name; describe more complex techniques in the Methods section.</i>                                                               |
| <input type="checkbox"/>            | <input checked="" type="checkbox"/> A description of all covariates tested                                                                                                                                                                                                                     |
| <input type="checkbox"/>            | <input checked="" type="checkbox"/> A description of any assumptions or corrections, such as tests of normality and adjustment for multiple comparisons                                                                                                                                        |
| <input type="checkbox"/>            | <input checked="" type="checkbox"/> A full description of the statistical parameters including central tendency (e.g. means) or other basic estimates (e.g. regression coefficient) AND variation (e.g. standard deviation) or associated estimates of uncertainty (e.g. confidence intervals) |
| <input type="checkbox"/>            | <input checked="" type="checkbox"/> For null hypothesis testing, the test statistic (e.g. $F$ , $t$ , $r$ ) with confidence intervals, effect sizes, degrees of freedom and $P$ value noted<br><i>Give <math>P</math> values as exact values whenever suitable.</i>                            |
| <input checked="" type="checkbox"/> | <input type="checkbox"/> For Bayesian analysis, information on the choice of priors and Markov chain Monte Carlo settings                                                                                                                                                                      |
| <input checked="" type="checkbox"/> | <input type="checkbox"/> For hierarchical and complex designs, identification of the appropriate level for tests and full reporting of outcomes                                                                                                                                                |
| <input checked="" type="checkbox"/> | <input type="checkbox"/> Estimates of effect sizes (e.g. Cohen's $d$ , Pearson's $r$ ), indicating how they were calculated                                                                                                                                                                    |

*Our web collection on [statistics for biologists](#) contains articles on many of the points above.*

### Software and code

Policy information about [availability of computer code](#)

Data collection

Data analysis

For manuscripts utilizing custom algorithms or software that are central to the research but not yet described in published literature, software must be made available to editors and reviewers. We strongly encourage code deposition in a community repository (e.g. GitHub). See the Nature Portfolio [guidelines for submitting code & software](#) for further information.

### Data

Policy information about [availability of data](#)

All manuscripts must include a [data availability statement](#). This statement should provide the following information, where applicable:

- Accession codes, unique identifiers, or web links for publicly available datasets
- A description of any restrictions on data availability
- For clinical datasets or third party data, please ensure that the statement adheres to our [policy](#)

The RNA-seq datasets generated and analyzed during the current study are available in the GEO repository GSE196610 and GSE235225. The mass spectrometry proteomics data have been deposited to the ProteomeXchange Consortium via the PRIDE partner repository with the dataset identifier PXD040018.

## Field-specific reporting

Please select the one below that is the best fit for your research. If you are not sure, read the appropriate sections before making your selection.

Life sciences  Behavioural & social sciences  Ecological, evolutionary & environmental sciences

For a reference copy of the document with all sections, see [nature.com/documents/nr-reporting-summary-flat.pdf](https://www.nature.com/documents/nr-reporting-summary-flat.pdf)

## Life sciences study design

All studies must disclose on these points even when the disclosure is negative.

|                 |                                                                                                                                                                                           |
|-----------------|-------------------------------------------------------------------------------------------------------------------------------------------------------------------------------------------|
| Sample size     | For in vivo mouse studies, we have projected group size estimates based on power analyses and previous experiences.                                                                       |
| Data exclusions | no data was excluded                                                                                                                                                                      |
| Replication     | we tested our hypotheses using multiple approaches when feasible to enhance scientific rigor and reproducibility. in vitro all experiments were performed at least 3 times independently. |
| Randomization   | Animals were randomly assigned numbers at weaning. Once assigned to groups, the genotype was not be linked to the numbers until data analysis following completion of all studies.        |
| Blinding        | Investigators were blinded to allocation during experiments and outcome assessments, and data was collected and analyzed in a blinded fashion.                                            |

## Reporting for specific materials, systems and methods

We require information from authors about some types of materials, experimental systems and methods used in many studies. Here, indicate whether each material, system or method listed is relevant to your study. If you are not sure if a list item applies to your research, read the appropriate section before selecting a response.

### Materials & experimental systems

| n/a                                 | Involvement in the study                                        |
|-------------------------------------|-----------------------------------------------------------------|
| <input type="checkbox"/>            | <input checked="" type="checkbox"/> Antibodies                  |
| <input type="checkbox"/>            | <input checked="" type="checkbox"/> Eukaryotic cell lines       |
| <input checked="" type="checkbox"/> | <input type="checkbox"/> Palaeontology and archaeology          |
| <input type="checkbox"/>            | <input checked="" type="checkbox"/> Animals and other organisms |
| <input checked="" type="checkbox"/> | <input type="checkbox"/> Human research participants            |
| <input checked="" type="checkbox"/> | <input type="checkbox"/> Clinical data                          |
| <input checked="" type="checkbox"/> | <input type="checkbox"/> Dual use research of concern           |

### Methods

| n/a                                 | Involvement in the study                        |
|-------------------------------------|-------------------------------------------------|
| <input checked="" type="checkbox"/> | <input type="checkbox"/> ChIP-seq               |
| <input checked="" type="checkbox"/> | <input type="checkbox"/> Flow cytometry         |
| <input checked="" type="checkbox"/> | <input type="checkbox"/> MRI-based neuroimaging |

## Antibodies

### Antibodies used

Anti-TOMM20 rabbit polyclonal antibody; Millipore Sigma; HPA011562  
 Anti-Cytochrome c mouse monoclonal antibody; BioLegend; 612301  
 Anti-Bax(6A7) mouse monoclonal antibody; Santa Cruz; sc-23959  
 Anti-Phospho-Histone H2A.X (Ser139) (20E3) rabbit monoclonal antibody; Cell Signaling; 9718  
 Anti-DNA mouse monoclonal antibody; Millipore Sigma; CBL186  
 Anti-TFAM rabbit monoclonal antibody; Cell Signaling; 8076S  
 Anti-p16 (E6H4) mouse monoclonal antibody; Roche; 705-4713  
 Anti p21 Waf1 Cip1 (12D1) rabbit monoclonal antibody; Cell Signaling; 2947S  
 Anti-Ki67 rabbit polyclonal antibody; Abcam; ab15580  
 Anti-Bax (D3R2M) rabbit monoclonal antibody; Cell Signaling; 14796  
 Anti-Cleaved Caspase-3 (Asp175) Antibody; Cell Signaling; 9661  
 Goat anti-Rabbit IgG (H+L), Superclonal™ Recombinant Secondary Antibody, Alexa Fluor 647; Thermo Fisher Scientific; A-27040  
 Goat anti-Rabbit IgG (H+L) Cross-Adsorbed Secondary Antibody, Alexa Fluor 488; Thermo Fisher Scientific; A-11008  
 Goat anti-Rabbit IgG (H+L) Cross-Adsorbed Secondary Antibody, Alexa Fluor 594; Thermo Fisher Scientific; A-11012  
 Goat anti-Mouse IgG (H+L) Highly Cross-Adsorbed Secondary Antibody, Alexa Fluor 594; Thermo Fisher Scientific; A-11032  
 Goat anti-Mouse IgG (H+L) Cross-Adsorbed Secondary Antibody, Alexa Fluor 647; Thermo Fisher Scientific; A-21235  
 Goat anti-Mouse IgG (H+L), Superclonal™ Recombinant Secondary Antibody, Alexa Fluor 488; Thermo Fisher Scientific; A-28175  
 Anti-cytochrome c (D18C7) rabbit monoclonal antibody; Cell Signaling; 11940S  
 Anti-UQCR2 rabbit monoclonal antibody; Abcam; ab103616  
 Anti-Cleaved Caspase 3 (D175 hAIE) rabbit monoclonal antibody; Cell Signaling; 9664S  
 Anti-β-actin mouse monoclonal antibody; Abcam; ab8226  
 Anti-TFAM rabbit monoclonal antibody; Cell Signaling; 8076S

Anti-Bak (D4E4) rabbit monoclonal antibody; Cell Signaling; 12105  
 Anti-Bax (D2E11) rabbit monoclonal antibody; Cell Signaling; 5023  
 Anti-Bax (6A7) mouse monoclonal antibody; Santa Cruz; sc-23959  
 Anti- $\beta$ -Tubulin rabbit polyclonal antibody; Cell Signaling; 2146S  
 Anti-Lamin B1 rabbit polyclonal antibody; Abcam; ab16048  
 Anti-NDUFB8 mouse monoclonal antibody; Abcam; ab110242  
 Anti-GAPDH rabbit monoclonal antibody; Cell Signaling; 5174S  
 Anti-cGAS (D1D3G) rabbit monoclonal antibody; Cell Signaling; 15102  
 Anti-STING (D2P2F) rabbit monoclonal antibody; Cell Signaling; 13647S  
 Anti-APAF1 rabbit monoclonal antibody; Cell Signaling; 8723S  
 Anti-HMGB1 rabbit monoclonal antibody; Cell Signaling; 6893S  
 Goat Anti-Rabbit HRP Conjugated; Sigma Aldrich; A0545  
 Goat Anti-Mouse HRP Conjugated; Sigma Aldrich; A2554

## Validation

All antibodies used were purchased from commercial sources and reputable vendors (eg. Abcam, Cell Signaling). We selected them based on cross-reactivity with mouse and human (depending on our research needs) and carefully evaluated the validation data provided by both the vendors and literature. In several instances, we performed further validation of antibodies by examining the molecular weight of the band by Western blotting and Knocking out protein of interest. Antibodies were aliquoted and stored as recommended by the manufacturer to minimize freeze thaw cycles and associated loss in performance.

## Eukaryotic cell lines

Policy information about [cell lines](#)

|                                                                      |                                                               |
|----------------------------------------------------------------------|---------------------------------------------------------------|
| Cell line source(s)                                                  | IMR90 and MRC5 human fibroblasts were acquired from ATCC      |
| Authentication                                                       | none of the cells have been authenticated                     |
| Mycoplasma contamination                                             | all cell lines used have been regularly tested for Mycoplasma |
| Commonly misidentified lines<br>(See <a href="#">ICLAC</a> register) | N/A                                                           |

## Animals and other organisms

Policy information about [studies involving animals](#); [ARRIVE guidelines](#) recommended for reporting animal research

|                         |                                                                                                                                                  |
|-------------------------|--------------------------------------------------------------------------------------------------------------------------------------------------|
| Laboratory animals      | Information regarding experiments involving laboratory mice is in methods section.                                                               |
| Wild animals            | N/A                                                                                                                                              |
| Field-collected samples | N/A                                                                                                                                              |
| Ethics oversight        | All animal experiments were performed according to protocols approved by the Institutional Animal Care and Use Committee (IACUC) at Mayo Clinic. |

Note that full information on the approval of the study protocol must also be provided in the manuscript.
